# Supplementary material for: Experimental and Clinical Applications of Red and Near-Infrared Photobiomodulation on Endothelial Dysfunction: A Review
Source: PubMed Central journal article supplement (PMC7998572; doi:10.3390/biomedicines9030274), 2021-03-09
Supplement: biomedicines-09-00274-s001.pdf [file biomedicines-09-00274-s001.pdf]

# Supplementary Materials

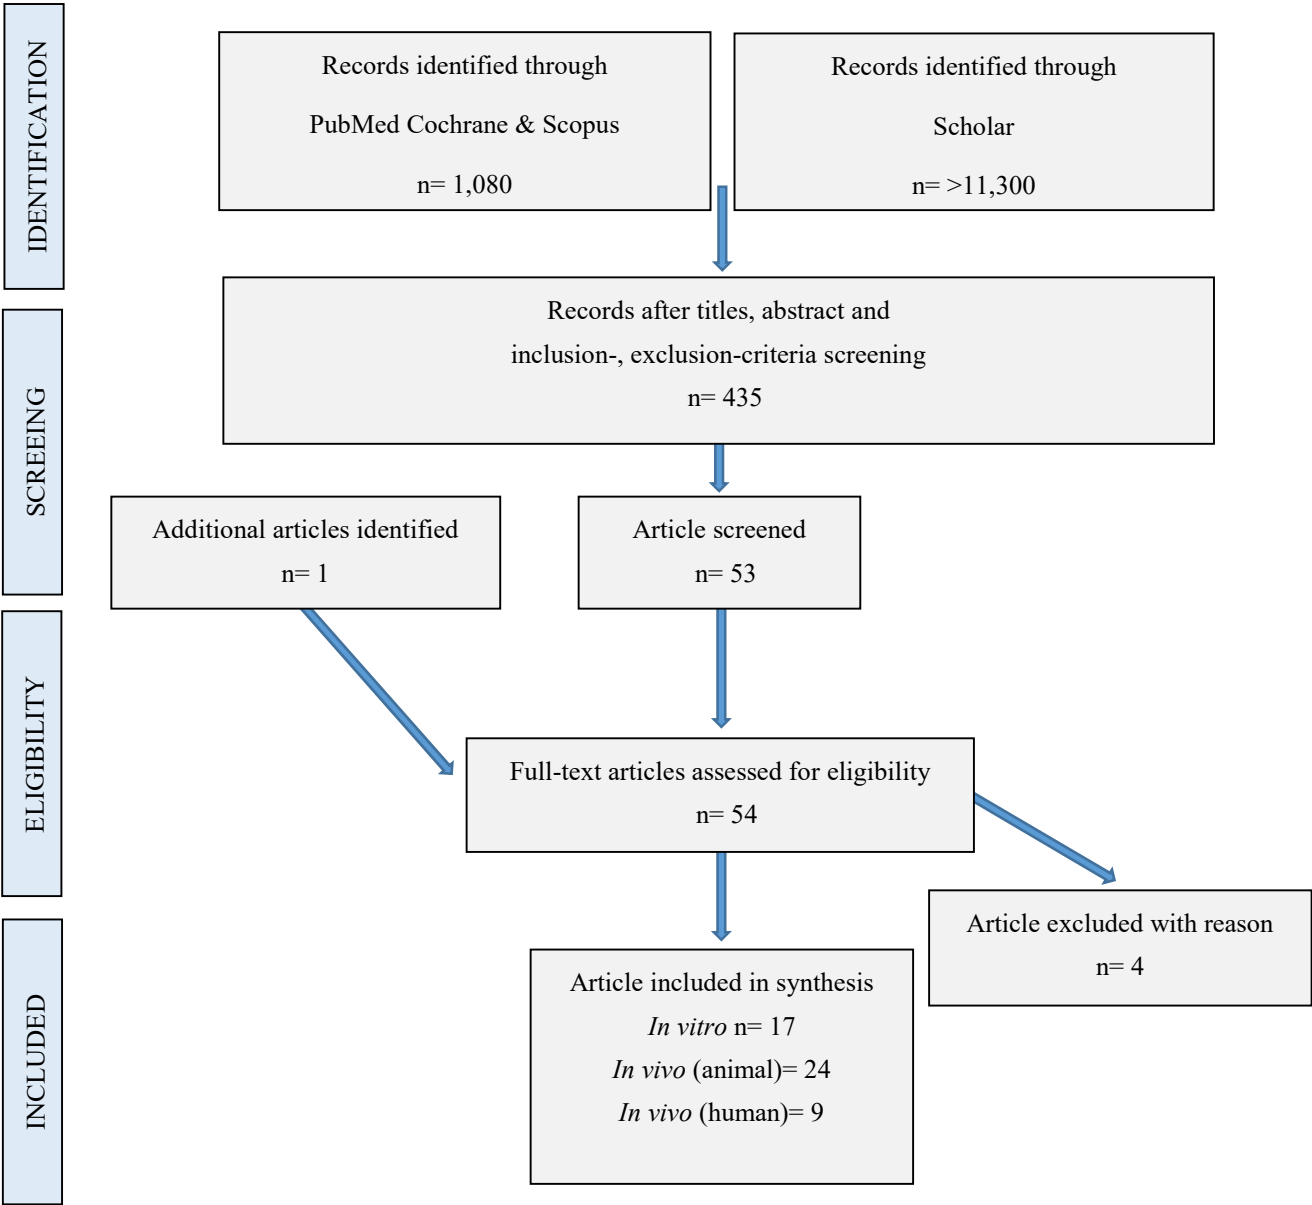

Figure S1: Flow chart demonstrating the selection process.
